# Supplementary material for: Anchorable phosphorylcholine copolymer synthesis and cell membrane mimetic antifouling coating fabrication for blood compatible applications
Source: Royal Society of Chemistry journal article supplement (doi:10.1039/d0tb00540a), 2020-01-01
Supplement: d0tb00540a1.pdf [file d0tb00540a1.pdf]

## Supplementary Information

### **Anchorable phosphorylcholine copolymer synthesis and cell membrane mimetic antifouling coating fabrication for blood compatible applications**

Yao Ma,<sup>†</sup> Xin-Yu Qiao,<sup>†</sup> Qian Lu,<sup>†</sup> Rong Li,<sup>†</sup> Yun-Jie Bai,<sup>†</sup> Xin Li,<sup>†</sup> Shi-Ping Zhang<sup>†</sup> and Yong-Kuan Gong<sup>\*,†,‡</sup>

<sup>†</sup>Key Laboratory of Synthetic and Natural Functional Molecule Chemistry of Ministry of Education, College of Chemistry & Materials Science, Northwest University, Xi'an 710127, Shaanxi, PR China

<sup>‡</sup>Institute of Materials Science and New Technology, Northwest University, Xi'an 710127, Shaanxi, PR China

\*Corresponding author: gongyk@nwu.edu.cn

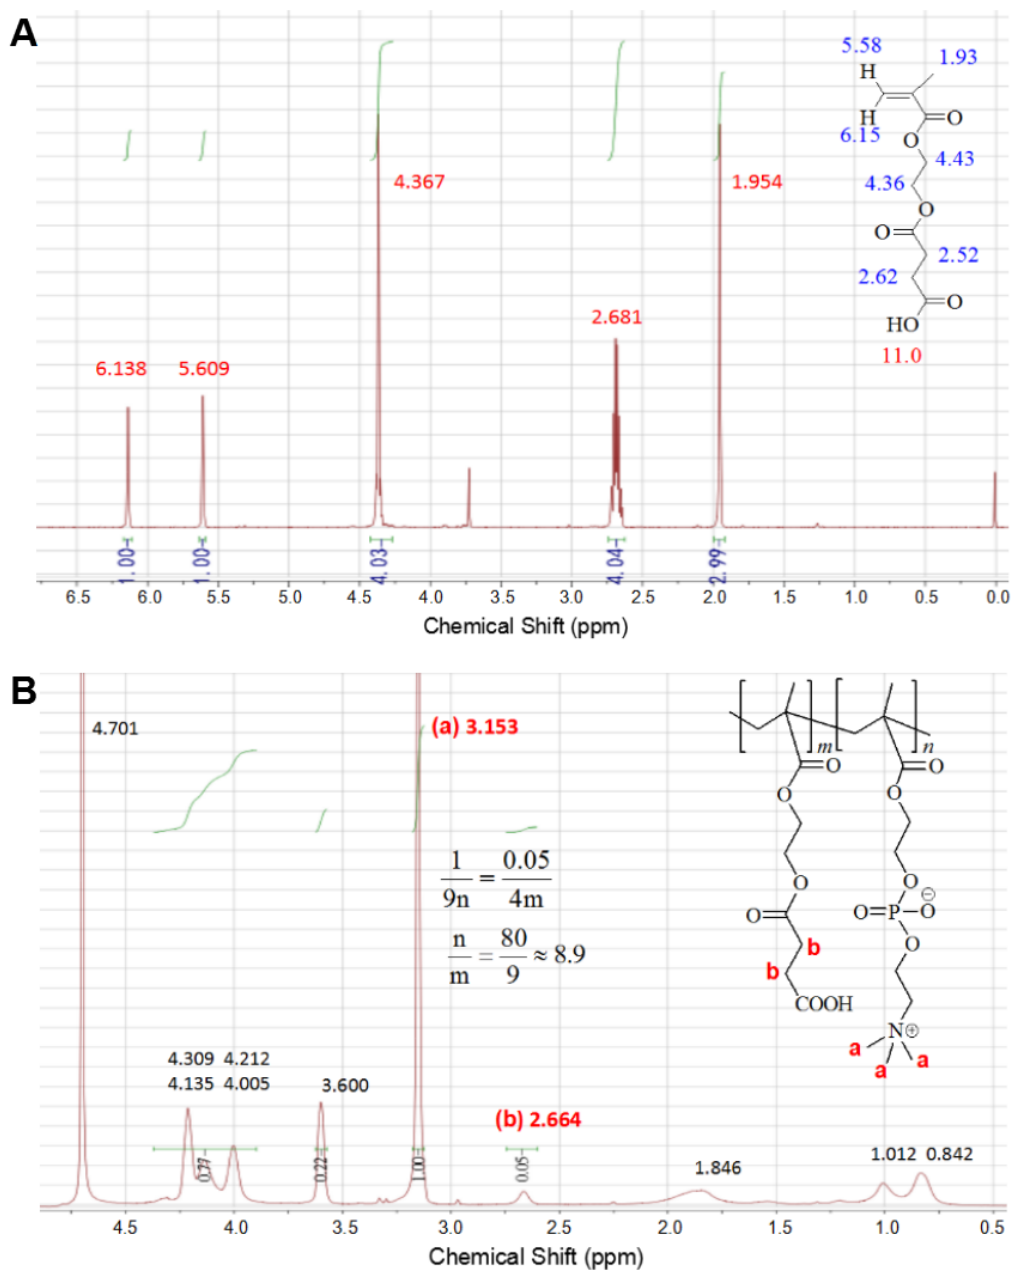

**Fig. S1.**  $^1\text{H}$  NMR spectra of SMA monomer (A) and the PMPCC10 copolymer (B). The inserted chemical structure of SMA is labeled with the simulated chemical shift.

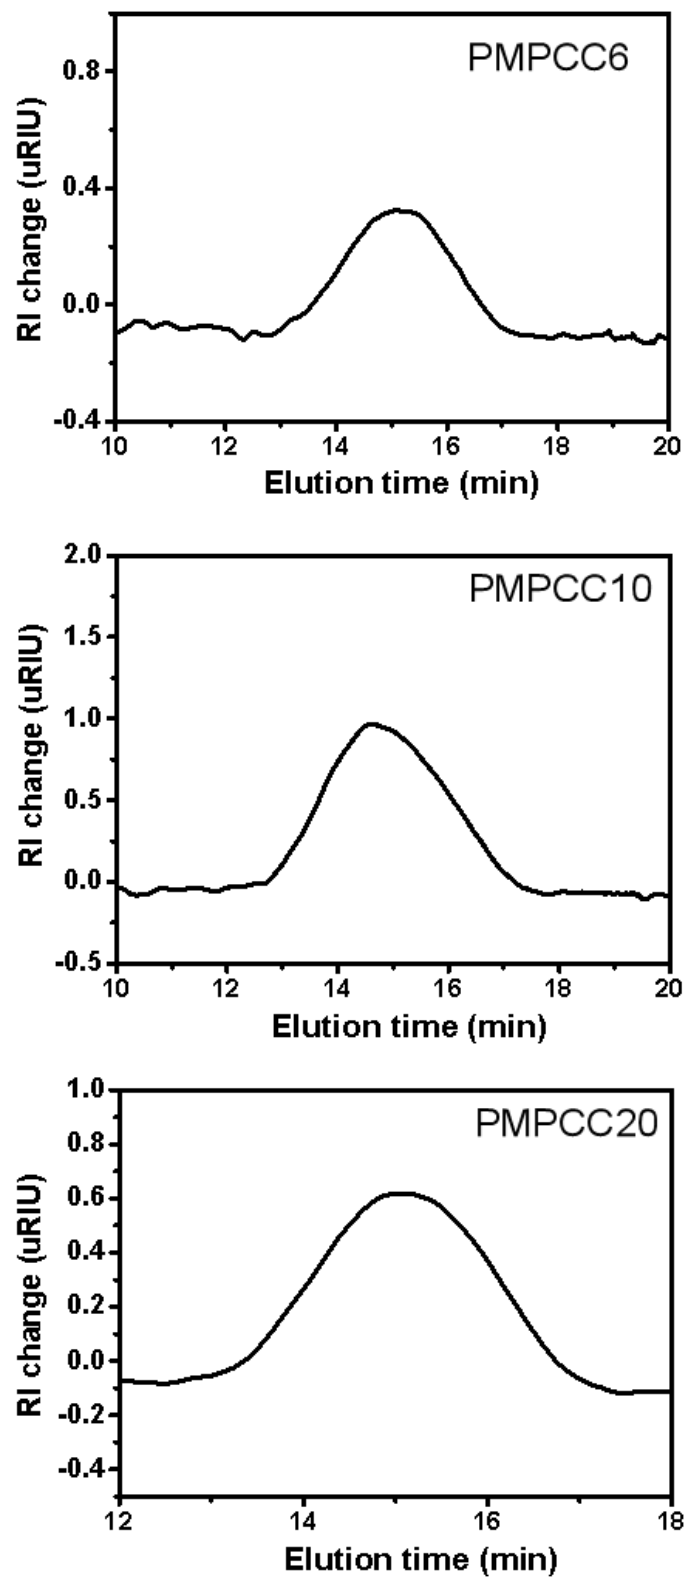

**Fig. S2.** GPC elution time vs refractive index change of PMPCC aqueous solutions containing 0.20 mol/L  $\text{NaNO}_3$  at 35°C.

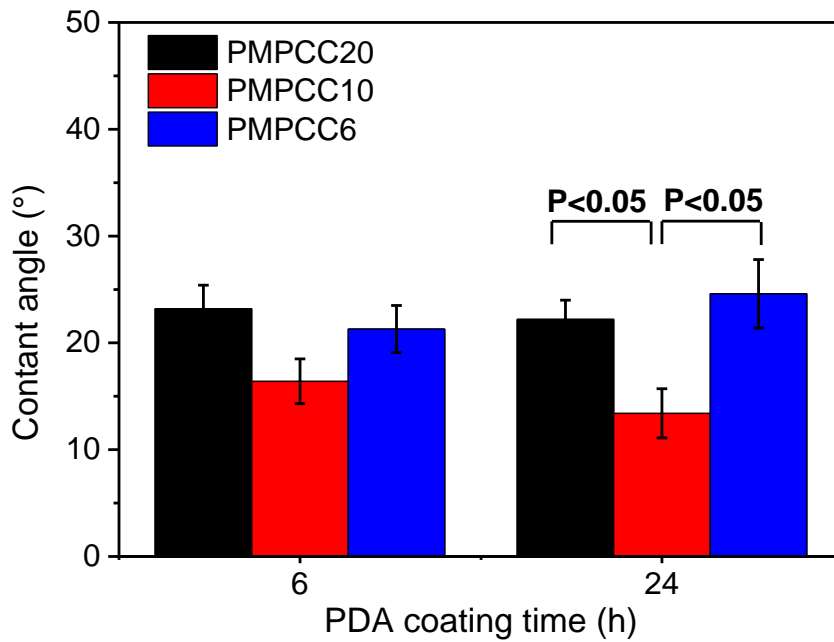

**Fig. S3.** Water contact angle change with the surface anchored PMPCC copolymers containing different molar percentage of the carboxylic acid units. PMPCC10 coated surfaces on both the thin (6h) or thick (24h) PDA primer layers show lowest contact angle among the higher and lower carboxylic acid content samples. Data represent mean  $\pm$  SD (n = 3).

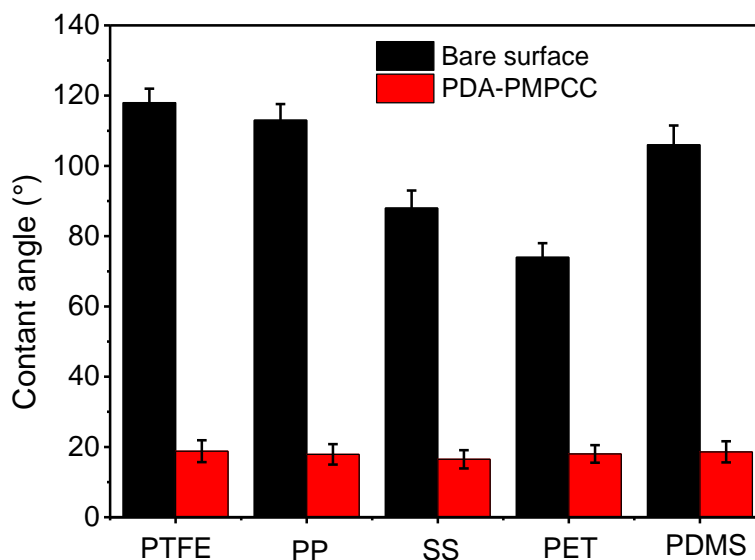

**Fig. S4.** Water contact angles of the bare and PDA-PMPCC10 coated polytetrafluoroethylene (PTFE), polypropylene (PP), stainless steel (SS), polyethylene glycol terephthalate (PET), polydimethylsiloxane (PDMS) surfaces. The remarkable decrease of water contact angles of all the modified material surfaces demonstrate the effectiveness of the PDA-PMPCC coating. Data represent mean  $\pm$  SD (n = 4).

**Table S1.** Structure and surface immobilized density of differently designed MPC copolymers.

| Copolymer | Structure                                                                           | Spacer arm length | Immobilized PC content         | Reference |
|-----------|-------------------------------------------------------------------------------------|-------------------|--------------------------------|-----------|
| PMA       | 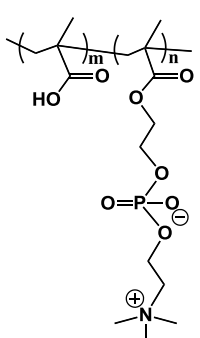   | 0 atom            | 0.8 P% on plat titanium alloy  | [1]       |
| PMEN      |   | 5 atoms           | 0.9 N+% on flat silicon        | [2]       |
|           |                                                                                     |                   | 1.29 P% on flat glass          | [3]       |
|           |                                                                                     |                   | 3.0 P% on porous PVDF membrane | [4]       |
| PMPCC     |  | 8 atoms           | 2.40 P% on flat glass          | This work |

References:

- [1] Ye S.-H.; Johnson C. A. Jr; Woolley J. R; Snyder T. A; Gamble L. J; Wagner W. R. Covalent surface modification of a titanium alloy with a phosphorylcholine-containing copolymer for reduced thrombogenicity in cardiovascular devices. *J. Biomed. Mater. Res. A* 2009, 91(1), 18-28.
- [2] C.-M. Xing, F.-N. Meng, M. Quan, K. Ding, Y. Dang, Y.-K. Gong, Quantitative fabrication, performance optimization and comparison of PEG and zwitterionic polymer antifouling coatings, *Acta Biomaterialia* 2017, 59, 129-138.
- [3] T. Li, N. Li, Y. Ma, Y.-J. Bai, C.-M. Xing, Y.-K. Gong. Blood cell repelling and tumor cell capturing surface for highpurity enrichment of circulating tumor cells. *J. Mater. Chem. B* 2019, 7, 6087-6098.
- [4] F.-N. Meng, M.-Q. Zhang, K. Ding, T. Zhang, Y.-K. Gong, *J. Mater. Chem. A*, 2018, 6, 3231-3241.

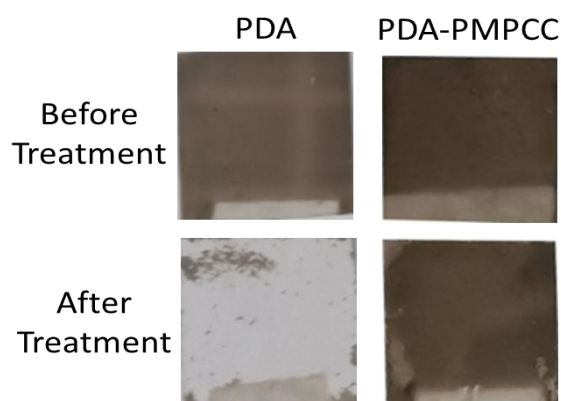

**Figure S5.** Photographs of PDA and PDA-PMPCC coated cover glasses before and after immersed in pH 13 NaOH aqueous solution for 2 hours. Obvious dissolution/detachment of the PDA coating is observed. By contrast, in significant dissolution/detachment of the PDA-PMPCC coating suggests the stablization effect from multipoint anchoring/crosslinking of PMPCC.

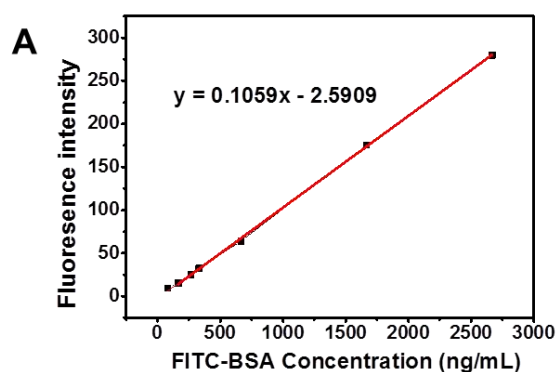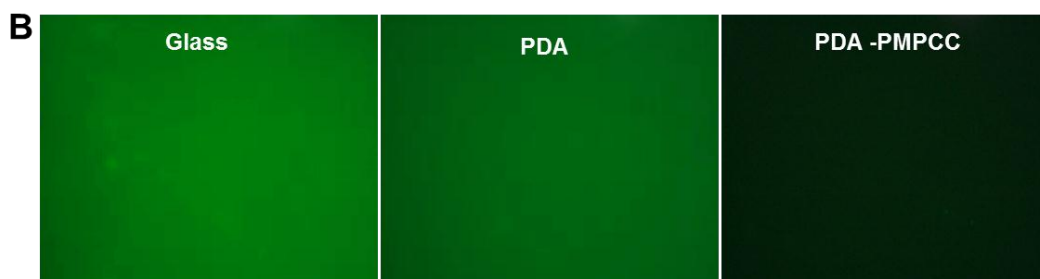

**Fig. S6.** (A) Fluorescence intensity vs concentration curve of FITC-BSA solutions. (B) Fluorescence microscopic images of the FITC-BSA adsorbed from 1.00 mg/mL solution on the bare, PDA and PDA-PMPCC coated glass surfaces.

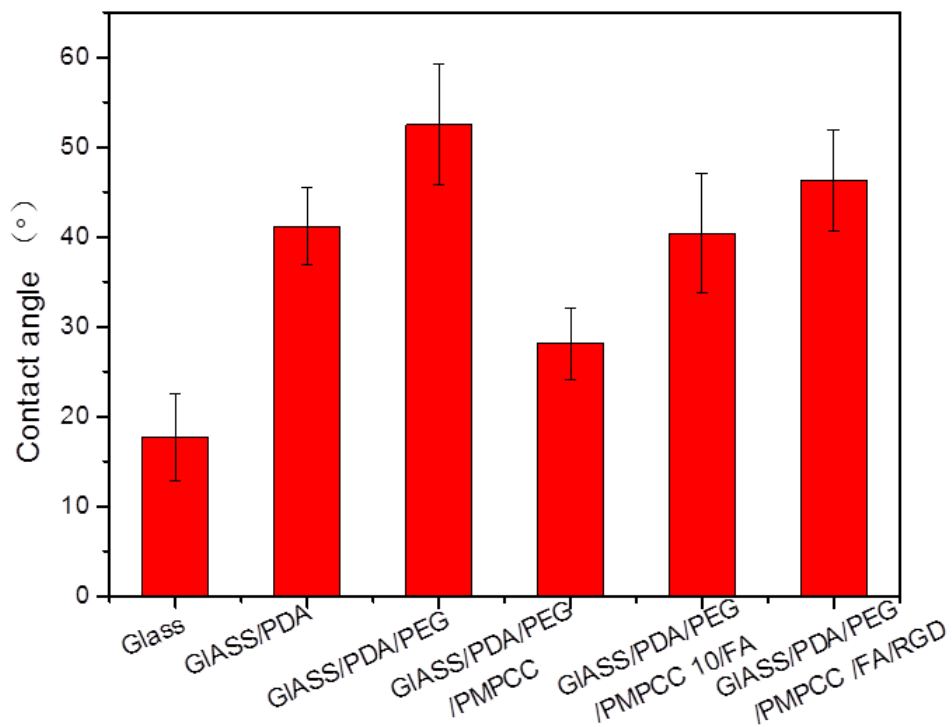

**Fig. S7.** Water contact angle changes during the step-by-step coating process of PDA-PEG-PMPCC-FA-RGD surface.
